# Supplementary material for: Emerging Effects of Resveratrol Derivatives in Cells Involved in Oral Wound Healing: A Preliminary Study
Source: MDPI journal article supplement (doi:10.3390/ijms24043276), 2023-02-07
Supplement: s1 [file s1]

## Supplemental Table of Contents

*Retention time of compound 1d and 1h*

**Figure S1.** *Retention time of compound 1d* 2

**Figure S2.** *Retention time of compound 1h* 4

**Figure S1.** Retention time of compound **1d**.

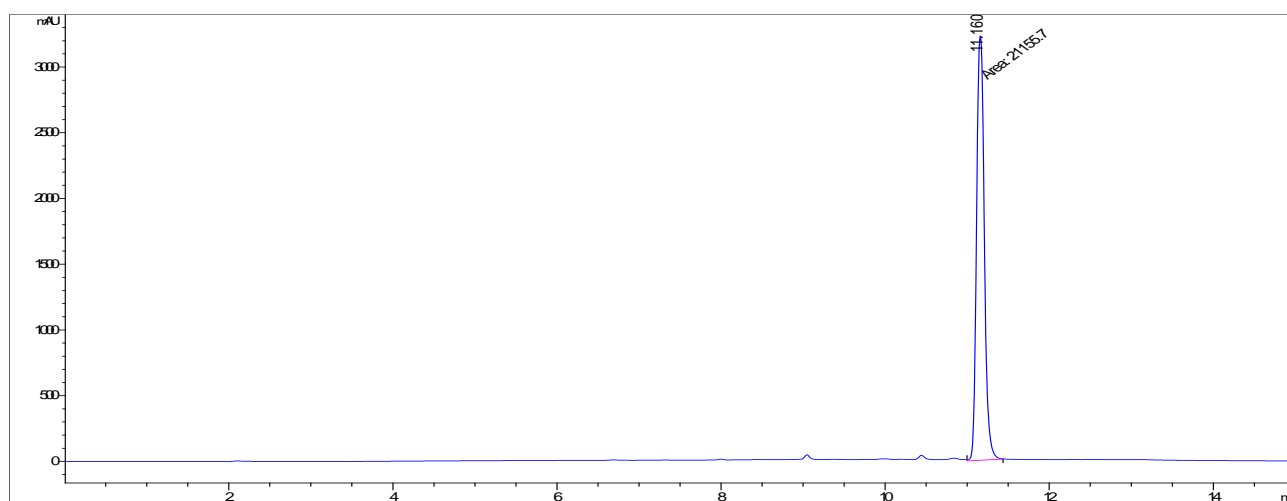

| Compound  | Retention time | Area% |
|-----------|----------------|-------|
| <b>1d</b> | 11.16          | >99%  |

**Figure S2.** Retention time of compound **1h**.

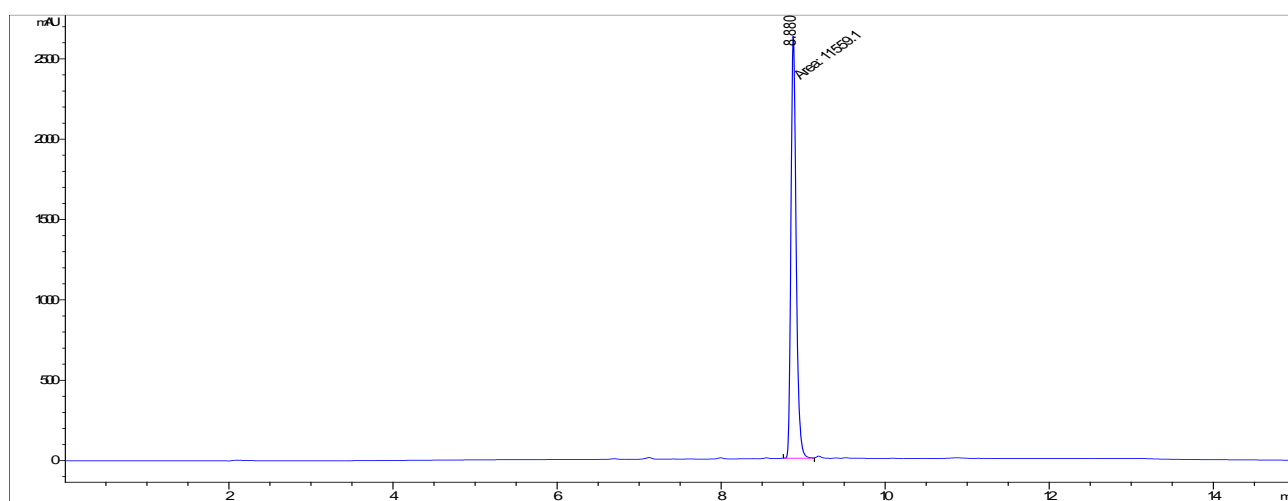

| Compound  | Retention time | Area% |
|-----------|----------------|-------|
| <b>1h</b> | 8.88           | >99 % |
